# Supplementary material for: Large-scale remodeling of a repressed exon ribonucleoprotein to an exon definition complex active for splicing
Source: eLife. 2016 Nov 24;5:e19743. doi: 10.7554/eLife.19743 (PMC5122456; doi:10.7554/eLife.19743)
Supplement: Supplementary file 1. — (a) Proteins present in the PTBP1-repressed (WT), the active (MUT) and the EDC complexes in SILAC experiment 1. (b) Proteins present in the PTBP1-repressed, the active-early and the EDC complexes in SILAC experiment 2. (c) Comparison of protein enrichments seen in SILAC experiment 1 and SILAC experiment 2. (d) NSAF scores of proteins identified in SILAC experiment 1. (e) NSAF scores of proteins from SILAC experiment 2. (f) Positions of PTBP1 crosslinking sites on validated PTBP1-repressed exons. DOI: http://dx.doi.org/10.7554/eLife.19743.012 [file elife-19743-supp1.xlsx]

## Sheet: Supplemental File 1a
Supplemental File 1a. Proteins present in the PTBP1-repressed (WT), the active (MUT) and the EDC complexes from SILAC experiment 1
Data from the SILAC experiment shown in Figure 4. Proteins detectable in all 3 complexes were used to plot the heatmaps.
Normalized SILAC ratios for each protein in each complex were renormalized the repressed complex to yield 'fold change' values from the repressed exon complex
Please refer to the manuscript for detailed calculations.
ND = No Dectection in MS
Gene	Known Alias	Repressed	Active	EDC	Name
ACLY		1	5.056	0.1736	ATP-citrate synthase
AQR		1	2.416	ND	Intron-binding protein aquarius
ARG1		1	ND	3.0473	Arginase-1
BUB3		1	1.824	3.3684	Mitotic checkpoint protein BUB3
C22orf28		1	1.648	ND	UPF0027 protein C22orf28
CD2BP2		1	ND	2.4578	CD2 antigen cytoplasmic tail-binding protein 2
CDC5L		1	1.856	1.1315	Cell division cycle 5-like protein
CDK12		1	ND	6.4263	Cell division protein kinase 12
CELF1		1	0.592	0.7	CUGBP Elav-like family member 1
CSDA		1	0.808	0.6315	DNA-binding protein A
DDX17	P72	1	2.928	1.2789	Probable ATP-dependent RNA helicase DDX17
DDX23	PRP28	1	1.96	1.9105	Probable ATP-dependent RNA helicase DDX23
DDX46	PRP5	1	1.824	6.621	Probable ATP-dependent RNA helicase DDX46
DDX5	P68	1	1.912	1.3631	Probable ATP-dependent RNA helicase DDX5
DHX15	PRP43	1	2.472	3.1421	Putative pre-mRNA-splicing factor ATP-dependent RNA helicase DHX15
DHX36		1	1.088	0.5789	Probable ATP-dependent RNA helicase DHX36
DNAJC8		1	ND	16.7	DnaJ homolog subfamily C member 8
EEF1A1	EF-Tu	1	2.816	1.7894	Elongation factor 1-alpha 1
EEF1A2		1	2.688	1.7315	Elongation factor 1-alpha 2
EEF1AL3		1	2.816	1.7894	Putative elongation factor 1-alpha-like 3
EFTUD2	SNU114	1	2.224	2.3736	116 kDa U5 small nuclear ribonucleoprotein component
EIF3B		1	ND	0.1105	Eukaryotic translation initiation factor 3 subunit B
ELAVL1		1	1.576	0.3947	ELAV-like protein 1
FAM120A		1	1.768	ND	Constitutive coactivator of PPAR-gamma-like protein 1
GGCT		1	ND	3.0947	Gamma-glutamylcyclotransferase
GPATCH8		1	ND	1.8	G patch domain-containing protein 8
HNRNPA0		1	1.176	0.2684	Heterogeneous nuclear ribonucleoprotein A0
HNRNPA1		1	0.736	0.0789	Heterogeneous nuclear ribonucleoprotein A1
HNRNPA2B1		1	0.992	0.1	Heterogeneous nuclear ribonucleoproteins A2/B1
HNRNPA3		1	0.896	0.0789	Heterogeneous nuclear ribonucleoprotein A3
HNRNPC		1	7.104	0.7684	Heterogeneous nuclear ribonucleoproteins C1/C2
HNRNPD		1	4.376	ND	Heterogeneous nuclear ribonucleoprotein D0
HNRNPF		1	0.592	0.4	Heterogeneous nuclear ribonucleoprotein F
HNRNPH1		1	0.736	0.3315	Heterogeneous nuclear ribonucleoprotein H
HNRNPH2		1	ND	0.321	Heterogeneous nuclear ribonucleoprotein H2
HNRNPH3		1	1.008	ND	Heterogeneous nuclear ribonucleoprotein H3
HNRNPK		1	2.384	0.3631	Heterogeneous nuclear ribonucleoprotein K
HNRNPL		1	1.8	ND	Heterogeneous nuclear ribonucleoprotein L
HNRNPR		1	3.84	0.9263	Heterogeneous nuclear ribonucleoprotein R
HNRNPU		1	4.568	ND	Heterogeneous nuclear ribonucleoprotein U
HNRNPUL2		1	4.248	ND	Heterogeneous nuclear ribonucleoprotein U-like protein 2
HNRPA1L3		1	0.736	0.0736	Putative heterogeneous nuclear ribonucleoprotein A1-like 3
HSPA1L		1	1.712	2.1789	Heat shock 70 kDa protein 1-like
HSPA2		1	ND	1.4105	Heat shock-related 70 kDa protein 2
HSPA5		1	1.744	4.8947	78 kDa glucose-regulated protein
HSPA8		1	1.688	1.4315	Heat shock cognate 71 kDa protein
HSPA9		1	ND	5.5368	Stress-70 protein, mitochondrial
HTATSF1		1	1.128	1.7473	HIV Tat-specific factor 1
IGF2BP3		1	2.136	0.4473	Insulin-like growth factor 2 mRNA-binding protein 3
ILF2		1	2.704	1.3157	Interleukin enhancer-binding factor 2
ILF3		1	2.392	1.4263	Interleukin enhancer-binding factor 3
LUC7L		1	ND	10.068	Putative RNA-binding protein Luc7-like 1
LUC7L2		1	1.224	9.6473	Putative RNA-binding protein Luc7-like 2
LUC7L3		1	1.264	2.121	Luc7-like protein 3
MATR3		1	ND	0.7473	Matrin-3
MBNL1		1	0.456	0.221	Muscleblind-like protein 1
NCBP1	CBP80	1	1.016	0.9947	Nuclear cap-binding protein subunit 1
NCBP2	CBP20	1	0.984	1.0052	Nuclear cap-binding protein subunit 2
PABPC1		1	0.448	ND	Polyadenylate-binding protein 1
PABPC1L		1	0.448	ND	Polyadenylate-binding protein 1-like
PABPC3		1	0.448	ND	Polyadenylate-binding protein 3
PABPC4		1	0.448	ND	Polyadenylate-binding protein 4
PCBP1	HNRNPE1, HNRNPX	1	1.28	6.2368	Poly(rC)-binding protein 1
PCBP2	HNRNPE2	1	0.664	1.1736	Poly(rC)-binding protein 2
PDCD6		1	0.968	0.2842	Programmed cell death protein 6
PHF5A	SF3B7, SAP14B	1	1.944	5.9526	PHD finger-like domain-containing protein 5A
PPIH		1	2.64	ND	Peptidyl-prolyl cis-trans isomerase H
PRDX1		1	22.768	ND	Peroxiredoxin-1
PRDX2		1	ND	17.973	Peroxiredoxin-2
PRKDC		1	1.248	1.1157	DNA-dependent protein kinase catalytic subunit
PRPF19	PRP19	1	1.536	1.2052	Pre-mRNA-processing factor 19
PRPF31	PRP31	1	ND	1.9052	U4/U6 small nuclear ribonucleoprotein Prp31
PRPF4	PRP4	1	2.536	2.0526	U4/U6 small nuclear ribonucleoprotein Prp4
PRPF40A	PRP40, FNBP3	1	1.864	5.1526	Pre-mRNA-processing factor 40 homolog A
PRPF6	PRP6	1	2.208	2.0526	Pre-mRNA-processing factor 6
PRPF8	PRP8	1	1.96	1.9157	Pre-mRNA-processing-splicing factor 8
PSMA1		1	1.248	ND	Proteasome subunit alpha type-1
PSMA7		1	1.256	0.3578	Proteasome subunit alpha type-7
PSMA8		1	1.2	ND	Proteasome subunit alpha type-7-like
PSMB6		1	1.136	ND	Proteasome subunit beta type-6
PTBP1	PTB	1	0.304	0.121	Polypyrimidine tract-binding protein 1
PUF60		1	1.184	4.3473	Poly(U)-binding-splicing factor PUF60
RAVER1		1	0.088	0.0105	Ribonucleoprotein PTB-binding 1
RBM25	SNU71	1	1.784	5.2789	RNA-binding protein 25
RBM39		1	2.216	11.2	RNA-binding protein 39
RBM45		1	1.928	1.0052	RNA-binding protein 45
RBM9	RBFOX2	1	0.832	0.2736	RNA-binding protein 9
RBMX	HNRNPG	1	3.568	2.1157	Heterogeneous nuclear ribonucleoprotein G
RNPS1		1	ND	0.1263	RNA-binding protein with serine-rich domain 1
RPS27A		1	9.352	7.6368	Ubiquitin
S100A7		1	0.848	ND	Protein S100-A7
SART1	SNU66	1	2.896	2.6631	U4/U6.U5 tri-snRNP-associated protein 1
SF1	BBP	1	2.112	5.2736	Splicing factor 1
SF3A1	SAP114	1	2.072	7.2421	Splicing factor 3A subunit 1
SF3A2	SF3A66, SAP62	1	1.832	6.6421	Splicing factor 3A subunit 2
SF3A3	SF3A60, SAP61	1	2.144	5.5421	Splicing factor 3A subunit 3
SF3B1	SF3B155, SAP155	1	2.08	5.9105	Splicing factor 3B subunit 1
SF3B14	SAP14	1	1.848	5.6631	Pre-mRNA branch site protein p14
SF3B2	SF3B145, SAP145, CUS1	1	2.264	6.2578	Splicing factor 3B subunit 2
SF3B3	SF3B130, SAP130	1	2.104	5.6684	Splicing factor 3B subunit 3
SF3B4	SF3B50, SAP49	1	2.496	5.3947	Splicing factor 3B subunit 4
SF3B5	SF3B10	1	ND	6.3	Splicing factor 3B subunit 5
SFRS1	ASF, SF2, SRp30a	1	1.352	2.4263	Splicing factor, arginine/serine-rich 1
SFRS11	SRSF11	1	1.104	2.7421	Splicing factor, arginine/serine-rich 11
SFRS12	SREK1	1	1.536	6.221	Splicing factor, arginine/serine-rich 12
SFRS13A	SRSF10, SRp38	1	ND	4.3894	Splicing factor, arginine/serine-rich 13A
SFRS3	SRSF3, SRp20	1	2.816	12.368	Splicing factor, arginine/serine-rich 3
SFRS4	SRSF4, SRp75	1	ND	1.6263	Splicing factor, arginine/serine-rich 4
SFRS5	SRSF5, SRp40	1	ND	9.021	Splicing factor, arginine/serine-rich 5
SFRS6	SRSF6, SRp55	1	1.024	2.4105	Splicing factor, arginine/serine-rich 6
SFRS7	SRSF7, 9G8	1	2.056	7.2789	Splicing factor, arginine/serine-rich 7
SFRS9	SRSF9, SRp30c	1	1.504	1.9736	Splicing factor, arginine/serine-rich 9
SKIV2L2		1	5.104	ND	Superkiller viralicidic activity 2-like 2
SNRNP200	BRR2	1	2.04	2.1315	U5 small nuclear ribonucleoprotein 200 kDa helicase
SNRNP40	SFP38, U5-40K	1	2.688	2.6736	U5 small nuclear ribonucleoprotein 40 kDa protein
SNRNP70	U1-70K	1	1.208	1.3736	U1 small nuclear ribonucleoprotein 70 kDa
SNRPA	U1A	1	1.168	1.3157	U1 small nuclear ribonucleoprotein A
SNRPA1	U2A'	1	1.88	6.1157	U2 small nuclear ribonucleoprotein A'
SNRPB	Sm-B/B'	1	1.128	1.9473	Small nuclear ribonucleoprotein-associated proteins B and B'
SNRPB2	U2B"	1	1.8	4.3842	U2 small nuclear ribonucleoprotein B''
SNRPC	U1C	1	1.168	1.1631	U1 small nuclear ribonucleoprotein C
SNRPD1	Sm-D	1	1.496	2.4684	Small nuclear ribonucleoprotein Sm D1
SNRPD2	Sm-D2	1	1.336	1.9315	Small nuclear ribonucleoprotein Sm D2
SNRPD3	Sm-D3	1	1.304	1.7894	Small nuclear ribonucleoprotein Sm D3
SNRPE	Sm-E	1	1.272	2.0157	Small nuclear ribonucleoprotein E
SNRPEL1		1	1.272	2.0157	Putative small nuclear ribonucleoprotein polypeptide E-like protein 1
SNRPF	Sm-F	1	1.344	2.1631	Small nuclear ribonucleoprotein F
SNRPG	Sm-G	1	ND	2.3473	Small nuclear ribonucleoprotein G
SNRPGP15		1	ND	2.3684	Small nuclear ribonucleoprotein G-like protein
SNRPN	Sm-N	1	1.104	1.8736	Small nuclear ribonucleoprotein-associated protein N
SRRM2	CWC21, SRm300	1	2.088	1.1789	Serine/arginine repetitive matrix protein 2
SRRT	ARS2	1	1.664	3.8	Serrate RNA effector molecule homolog
STRBP		1	3.84	ND	Spermatid perinuclear RNA-binding protein
SYNCRIP	HNRNPQ	1	4.12	0.6736	Heterogeneous nuclear ribonucleoprotein Q
THOC2		1	ND	1.7631	THO complex subunit 2
THRAP3		1	ND	2.1421	Thyroid hormone receptor-associated protein 3
TRA2B	SFRS10	1	3.312	14.242	Transformer-2 protein homolog beta
U2AF1	U2AF35	1	1.32	2.4473	Splicing factor U2AF 35 kDa subunit
U2AF2	U2AF65, MUD2	1	1.592	2.8736	Splicing factor U2AF 65 kDa subunit
USP39	SAD1	1	1.208	2.0578	U4/U6.U5 tri-snRNP-associated protein 2
YBX1	YB-1, CSDB	1	0.848	0.6684	Nuclease-sensitive element-binding protein 1
ZC3H18		1	3.24	11.268	Zinc finger CCCH domain-containing protein 18
ZC3H4		1	4.52	ND	Zinc finger CCCH domain-containing protein 4
ZCCHC8		1	1.976	ND	Zinc finger CCHC domain-containing protein 8
ZNF207		1	1.512	3.7315	Zinc finger protein 207

## Sheet: Supplemental File 1b
Supplemental File 1b. Proteins present in the PTBP1-repressed, the active and the EDC complexes in SILAC experiment 2
Data from SILAC experiment 2 examining proteins bound to WT RNA in PTBP1-depleted extract for the active and the EDC complexes, and proteins bound to WT RNA in mock-depleted extract for the repressed complex
Normalized SILAC ratios of each protein in each complex are shown.
Please refer to the manuscript for detailed calculations.
ND = No Dectection in MS
Proteins at very low levels of detection are given ratios of 0.00.
Gene	Known Alias	Repressed	Active	EDC	Name
ACIN1		ND	0.32601	1.03214	Apoptotic chromatin condensation inducer in the nucleus
ACLY		0.196189	4.12828	0.00562984	ATP-citrate synthase
ACTB		0.076851	0.106308	0.0675581	Actin, cytoplasmic 1
ACTG1		0.0762262	0.106308	0.0656814	Actin, cytoplasmic 2
ALDOA		0.00999688	0.00992204	0.0070373	Fructose-bisphosphate aldolase A
ANXA2		0.612309	0.477675	0.311987	Annexin A2
APEX1		0.0199938	0.0489015	0.0614591	DNA-(apurinic or apyrimidinic site) lyase
BAT1	UAP56, DDX39B	ND	0.866052	0.25475	Spliceosome RNA helicase BAT1
BUB3		0.253671	0.304748	0.578466	Mitotic checkpoint protein BUB3
CCT8		0.723524	0.0552799	ND	T-complex protein 1 subunit theta
CD2BP2		ND	0.934798	0.00140746	CD2 antigen cytoplasmic tail-binding protein 2
CDC5L		1.14964	1.32743	0.523575	Cell division cycle 5-like protein
CDK11A		0.0131209	0.0283487	ND	Cell division protein kinase 11A
CDK11B		0.0131209	0.0283487	ND	Cell division protein kinase 11B
CELF1		0.645423	0.180014	0.520291	CUGBP Elav-like family member 1
CSDA		1.3477	2.06449	1.05325	DNA-binding protein A
CYCS		0.028741	0.0184266	0.0154821	Cytochrome c
DDX17	P72	0.559825	0.919915	0.736101	Probable ATP-dependent RNA helicase DDX17
DDX23	PRP28	0.33677	0.693125	0.335914	Probable ATP-dependent RNA helicase DDX23
DDX46	PRP5	0.584817	0.851878	2.50856	Probable ATP-dependent RNA helicase DDX46
DDX5	P68	0.968447	1.78101	0.771757	Probable ATP-dependent RNA helicase DDX5
DHX15	PRP43	0.188691	0.609497	0.452733	Putative pre-mRNA-splicing factor ATP-dependent RNA helicase DHX15
DHX36		0.409872	0.527994	0.407694	Probable ATP-dependent RNA helicase DHX36
DHX9	DDX9	0.0549828	0.286322	ND	ATP-dependent RNA helicase A
DNAJC8		0.0549828	0.0985117	0.725311	DnaJ homolog subfamily C member 8
DSC1		0.118713	0.170092	0.0525452	Desmocollin-1
DSP		0.122462	0.682495	0.366878	Desmoplakin
EEF1A1	EF-Tu	4.28116	5.98512	1.0692	Elongation factor 1-alpha 1
EEF1AL3		4.28116	5.98512	1.0692	Putative elongation factor 1-alpha-like 3
EEF1B2		0.022493	0.070163	ND	Elongation factor 1-beta
EFTUD2	SNU114	0.41737	0.773919	0.652592	116 kDa U5 small nuclear ribonucleoprotein component
ELAVL1		0.460481	0.315379	0.445226	ELAV-like protein 1
ENO1		0.0106217	0.0177179	0.0079756	Alpha-enolase
ERH		ND	0.297661	0.282899	Enhancer of rudimentary homolog
FAM120A		0.662293	0.338767	ND	Constitutive coactivator of PPAR-gamma-like protein 1
FLG2		0.972196	0.321758	0.194229	Filaggrin-2
FUS	TLS, HNRNPP2	0.450484	0.369242	0.247244	RNA-binding protein FUS
GAPDH		0.0187441	0.0311836	0.0211119	Glyceraldehyde-3-phosphate dehydrogenase
GBE1		0.00562324	0.00496102	0.000938306	1,4-alpha-glucan-branching enzyme
GEMIN5		0.0693533	0.0396882	0.0225194	Gem-associated protein 5
HNRNPA1		0.25492	0.0581148	0.0623974	Heterogeneous nuclear ribonucleoprotein A1
HNRNPA2B1		0.131834	0.0545712	0.0309641	Heterogeneous nuclear ribonucleoproteins A2/B1
HNRNPA3		0.20806	0.0673281	0.0614591	Heterogeneous nuclear ribonucleoprotein A3
HNRNPC		1.40331	7.41318	1.02791	Heterogeneous nuclear ribonucleoproteins C1/C2
HNRNPD		0.229928	0.661233	0.238799	Heterogeneous nuclear ribonucleoprotein D0
HNRNPF		0.449235	ND	0.0853859	Heterogeneous nuclear ribonucleoprotein F
HNRNPG		0.0699781	0.18214	0.0863242	Heterogeneous nuclear ribonucleoprotein G
HNRNPH1		0.524211	0.0871722	0.141215	Heterogeneous nuclear ribonucleoprotein H
HNRNPK		0.231803	0.638554	0.242083	Heterogeneous nuclear ribonucleoprotein K
HNRNPL		0.0612309	0.111977	0.0567675	Heterogeneous nuclear ribonucleoprotein L
HNRNPR		0.232427	0.484054	0.107905	Heterogeneous nuclear ribonucleoprotein R
HNRNPU		0.38363	0.501772	0.21581	Heterogeneous nuclear ribonucleoprotein U
HNRNPUL2		0.311778	0.392629	ND	Heterogeneous nuclear ribonucleoprotein U-like protein 2
HRNR		ND	3.03189	2.66714	Hornerin
HSPA1A		0.539831	0.815025	0.467277	Heat shock 70 kDa protein 1A/1B
HSPA1L		0.540456	0.899362	0.181562	Heat shock 70 kDa protein 1-like
HSPA5		0.0912215	0.119064	0.070373	78 kDa glucose-regulated protein
HSPA6		0.52921	0.848335	0.377199	Heat shock 70 kDa protein 6
HSPA8		0.589191	1.0085	0.456017	Heat shock cognate 71 kDa protein
HTATSF1		0.162449	0.459957	0.281023	HIV Tat-specific factor 1
IARS		0.00562324	0.0283487	ND	Isoleucyl-tRNA synthetase, cytoplasmic
ILF2		0.00249922	ND	0.0661506	Interleukin enhancer-binding factor 2
ILF3		0.716651	0.192062	0.434905	Interleukin enhancer-binding factor 3
JUP		ND	0.538625	1.40605	Junction plakoglobin
KRT1		10.3137	29.3997	5.6988	Keratin, type II cytoskeletal 1
KRT10		7.9975	6.45783	4.34295	Keratin, type I cytoskeletal 10
KRT13		ND	0.466336	0.157166	Keratin, type I cytoskeletal 13
KRT15		ND	0.466336	1.92494	Keratin, type I cytoskeletal 15
KRT16		ND	0.540751	23.5416	Keratin, type I cytoskeletal 16
KRT2		10.4973	19.3962	2.72625	Keratin, type II cytoskeletal 2 epidermal
KRT5		0.96095	3.71935	0.38799	Keratin, type II cytoskeletal 5
KRT9		4.94221	7.03189	4.91297	Keratin, type I cytoskeletal 9
LARS		0.206186	0.231042	ND	Leucyl-tRNA synthetase, cytoplasmic
LTF		ND	0.204111	0.841661	Lactotransferrin
LUC7L		0.424242	0.330262	ND	Putative RNA-binding protein Luc7-like 1
LUC7L2		0.30303	0.180014	0.638048	Putative RNA-binding protein Luc7-like 2
LUC7L3		0.980319	1.15521	1.37321	Luc7-like protein 3
MBNL1		2.0881	0.253721	0.955196	Muscleblind-like protein 1
NCBP1	CBP80	1.18963	1.06804	1.18743	Nuclear cap-binding protein subunit 1
NCBP2	CBP20	0.810372	0.931963	0.812573	Nuclear cap-binding protein subunit 2
PA2G4		ND	0.0198441	0.385644	Proliferation-associated protein 2G4
PCBP1	HNRNPE1, HNRNPX	0.505467	0.373494	1.93057	Poly(rC)-binding protein 1
PCBP2	HNRNPE2	0.99094	0.389086	1.53085	Poly(rC)-binding protein 2
PDCD6		0.295533	0.0829199	0.0417546	Programmed cell death protein 6
PEBP1		0.0106217	0.00779589	0.0070373	Phosphatidylethanolamine-binding protein 1
PGK1		0.00312402	0.0042523	0.00281492	Phosphoglycerate kinase 1
PHF5A	SF3B7, SAP14B	0.372384	0.493267	1.21276	PHD finger-like domain-containing protein 5A
PPIA		0.00124961	0.00141743	0.000469153	Peptidyl-prolyl cis-trans isomerase A
PPIB		0.00562324	0.00708717	0.00187661	Peptidyl-prolyl cis-trans isomerase B
PRDX1		0.363012	0.644933	ND	Peroxiredoxin-1
PRKDC		ND	0.533664	0.210181	DNA-dependent protein kinase catalytic subunit
PRKDC		0.0962199	0.109142	0.098053	DNA-dependent protein kinase catalytic subunit
PRPF19	PRP19	0.310528	0.7236	0.260849	Pre-mRNA-processing factor 19
PRPF38B		0.236176	0.268604	0.334506	Pre-mRNA-splicing factor 38B
PRPF4	PRP4	0.129335	0.7236	0.380014	U4/U6 small nuclear ribonucleoprotein Prp4
PRPF40A	PRP40, FNBP3	0.46423	0.583274	1.8297	Pre-mRNA-processing factor 40 homolog A
PRPF6	PRP6	0.33552	0.259391	0.0609899	Pre-mRNA-processing factor 6
PRPF8	PRP8	0.485473	0.731396	0.826179	Pre-mRNA-processing-splicing factor 8
PSMA1		1.32146	0.0439405	ND	Proteasome subunit alpha type-1
PSMA3		0.810997	1.46634	ND	Proteasome subunit alpha type-3
PSMA4		0.162449	1.92346	ND	Proteasome subunit alpha type-4
PSMA6		0.269291	2.25585	ND	Proteasome subunit alpha type-6
PSMA7		0.532334	1.06166	ND	Proteasome subunit alpha type-7
PSMB1		0.486723	0.708717	ND	Proteasome subunit beta type-1
PSMB5		0.694158	0.760454	ND	Proteasome subunit beta type-5
PTBP1	PTB	2.37676	0.0729979	0.0853859	Polypyrimidine tract-binding protein 1
PUF60		0.477351	0.547838	1.36852	Poly(U)-binding-splicing factor PUF60
PYGL		0.00437363	0.00566974	0.000938306	Glycogen phosphorylase, liver form
RBM25	SNU71	0.491721	0.605953	2.07835	RNA-binding protein 25
RBM39		0.497969	0.571226	2.09524	RNA-binding protein 39
RBM45		0.0868479	ND	0.0506685	RNA-binding protein 45
RBM5		0.0731022	1.55138	0.00656814	RNA-binding protein 5
RBMX	HNRNPG	ND	0.277108	0.116819	Heterogeneous nuclear ribonucleoprotein G
RPS27A		0.398625	0.4146	0.206427	Ubiquitin
SAP30BP		0.884724	0.982282	0.265541	SAP30-binding protein
SART1	SNU66	0.184942	0.259391	0.578466	U4/U6.U5 tri-snRNP-associated protein 1
SF1	BBP	0.164324	0.223955	0.899836	Splicing factor 1
SF3A1	SAP114	0.43049	0.586818	1.66409	Splicing factor 3A subunit 1
SF3A2	SF3A66, SAP62	0.358638	0.630758	1.35304	Splicing factor 3A subunit 2
SF3A3	SF3A60, SAP61	0.456107	0.571935	1.52053	Splicing factor 3A subunit 3
SF3B1	SF3B155, SAP155	0.577944	0.832034	1.85832	Splicing factor 3B subunit 1
SF3B14	SAP14	0.611059	0.921332	1.73493	Pre-mRNA branch site protein p14
SF3B2	SF3B145, SAP145, CUS1	0.464855	0.705174	1.64063	Splicing factor 3B subunit 2
SF3B3	SF3B130, SAP130	0.390503	0.537916	1.3643	Splicing factor 3B subunit 3
SF3B4	SF3B50, SAP49	0.388004	0.768958	0.146376	Splicing factor 3B subunit 4
SF3B5	SF3B10	0.389878	0.815025	1.24889	Splicing factor 3B subunit 5
SFRS1	ASF, SF2, SRp30a	0.0631053	0.0403969	0.0778794	Splicing factor, arginine/serine-rich 1
SFRS11	SRSF11	0.295533	0.676825	1.01759	Splicing factor, arginine/serine-rich 11
SFRS12	SREK1	0.261168	0.121191	1.14145	Splicing factor, arginine/serine-rich 12
SFRS13A	SRSF10, SRp38	ND	0.075124	0.0501994	Splicing factor, arginine/serine-rich 13A
SFRS2	SRSF2, SC35, SRP30b	0.00312402	0.00283487	0.00281492	Splicing factor, arginine/serine-rich 2
SFRS2B	SRSF8, SRp46	ND	0.00283487	0.00281492	Splicing factor, arginine/serine-rich 2B
SFRS3	SRSF3, SRp20	0.0581068	0.119064	0.189069	Splicing factor, arginine/serine-rich 3
SFRS4	SRSF4, SRp75	0.0724774	0.0616584	0.0924232	Splicing factor, arginine/serine-rich 4
SFRS5	SRSF5, SRp40	0.0443611	0.0311836	0.0877316	Splicing factor, arginine/serine-rich 5
SFRS6	SRSF6, SRp55	0.079975	0.0694543	0.134178	Splicing factor, arginine/serine-rich 6
SFRS7	SRSF7, 9G8	0.620431	0.479093	1.54398	Splicing factor, arginine/serine-rich 7
SFRS9	SRSF9, SRp30c	0.147454	0.300496	0.30448	Splicing factor, arginine/serine-rich 9
SNRNP200	BRR2	0.503593	0.738483	0.752522	U5 small nuclear ribonucleoprotein 200 kDa helicase
SNRNP40	SFP38, U5-40K	ND	0.569809	0.0079756	U5 small nuclear ribonucleoprotein 40 kDa protein
SNRNP70	U1-70K	0.523586	0.470588	0.49871	U1 small nuclear ribonucleoprotein 70 kDa
SNRPA	U1A	0.506092	0.530829	0.600985	U1 small nuclear ribonucleoprotein A
SNRPA1	U2A'	0.249297	0.661233	1.13441	U2 small nuclear ribonucleoprotein A'
SNRPB	Sm-B/B'	0.412371	0.507442	0.631011	Small nuclear ribonucleoprotein-associated proteins B and B'
SNRPB2	U2B"	0.452359	0.543586	0.961295	U2 small nuclear ribonucleoprotein B''
SNRPC	U1C	0.44736	0.472006	0.438189	U1 small nuclear ribonucleoprotein C
SNRPD1	Sm-D	0.461731	0.524451	0.733286	Small nuclear ribonucleoprotein Sm D1
SNRPD2	Sm-D2	0.434239	0.518072	0.693878	Small nuclear ribonucleoprotein Sm D2
SNRPD3	Sm-D3	0.433614	0.452162	0.538588	Small nuclear ribonucleoprotein Sm D3
SNRPF	Sm-F	0.537332	0.632884	0.549378	Small nuclear ribonucleoprotein F
SNRPN	Sm-N	0.408622	0.505315	0.628196	Small nuclear ribonucleoprotein-associated protein N
SOD1		ND	0.0992204	0.113066	Superoxide dismutase [Cu-Zn]
SRRM2	CWC21, SRm300	0.842862	1.31751	0.300727	Serine/arginine repetitive matrix protein 2
SRRT	ARS2	0.30428	0.422395	1.02228	Serrate RNA effector molecule homolog
STRBP		0.0443611	0.192062	ND	Spermatid perinuclear RNA-binding protein
SUB1		0.00187441	0.00212615	ND	Activated RNA polymerase II transcriptional coactivator p15
SYNCRIP	HNRNPQ	0.204936	0.38696	0.10509	Heterogeneous nuclear ribonucleoprotein Q
TGM3		0.421118	0.155209	0.198921	Protein-glutamine gamma-glutamyltransferase E
TKT		0.00249922	0.00850461	0.00938306	Transketolase
TPI1		0.0199938	0.0184266	0.0145437	Triosephosphate isomerase
TRA2A		0.174321	0.21545	0.263664	Transformer-2 protein homolog alpha
TRA2B	SFRS10	0.301781	0.34798	0.546094	Transformer-2 protein homolog beta
U2AF1	U2AF35	0.295533	0.313253	0.870279	Splicing factor U2AF 35 kDa subunit
U2AF2	U2AF65, MUD2	0.285536	0.248051	0.613183	Splicing factor U2AF 65 kDa subunit
USP39	SAD1	0.236176	0.185684	0.360779	U4/U6.U5 tri-snRNP-associated protein 2
XAB2		0.0493596	0.124734	ND	Pre-mRNA-splicing factor SYF1
XRCC5		0.120587	0.162296	ND	X-ray repair cross-complementing protein 5
YBX1	YB-1, CSDB	1.5339	2.37349	1.1574	Nuclease-sensitive element-binding protein 1
YWHAG		0.403624	0.165131	ND	14-3-3 protein gamma
ZNF207		0.514214	0.683203	1.11002	Zinc finger protein 207

## Sheet: Supplemental File 1c
Supplemental File 1c. Comparison of protein enrichments seen in SILAC 1 and SILAC 2
Normalized SILAC ratios from SILAC 1 and SILAC 2 were used to calculate Log2(Active/Repressed) and Log2(EDC/Active). Only proteins detected in all 3 exon complexes from SILAC 1 experiment were assessed.
ND = No Dectection in MS. Positive values indicate proteins enriched in the numerator complex; negative values indicate the proteins depleted in the numerator, 0 indicates an unchanged SILAC between the two complexes.
	Log2(Active/Repressed)		Log2(EDC/Active)		Known Alias
Gene	SILAC #1	SILAC #2	SILAC #1	SILAC #2
ACLY	2.338	4.39523	-4.86416	-9.51823
BUB3	0.867106	0.264662	0.884958	0.924613
CDC5L	0.892197	0.20745	-0.71396	-1.34216
CELF1	-0.756331	-1.84214	0.241758	1.53121
CSDA	-0.307573	0.615284	-0.355573	-0.970941
DDX17	1.54992	0.716524	-1.19501	-0.321596	P72
DDX23	0.970854	1.04135	-0.0369034	-1.04503	PRP28
DDX46	0.867106	0.542661	1.85994	1.55814	PRP5
DDX5	0.935083	0.878947	-0.488191	-1.20647	P68
DHX15	1.30568	1.69159	0.34605	-0.428959	PRP43
DHX36	0.121679	0.365349	-0.910292	-0.373035
EEF1A1	1.49365	0.483377	-0.654171	-2.48485	EF-Tu
EEF1A2	1.42653	ND	-0.634511	ND
EEF1AL3	1.49365	0.483377	-0.654171	-2.48485
EFTUD2	1.15316	0.890858	0.09392	-0.246002	SNU114
ELAVL1	0.656268	-0.546055	-1.99744	0.497452
HNRNPA0	0.233888	ND	-2.13143	ND
HNRNPA1	-0.442222	-2.13307	-3.22161	0.102579
HNRNPA2B1	-0.011588	-1.27251	-3.31034	-0.817543
HNRNPA3	-0.158429	-1.62772	-3.5054	-0.131584
HNRNPC	2.82863	2.40126	-3.2087	-2.85037
HNRNPF	-0.756331	ND	-0.565597	ND
HNRNPH1	-0.442222	-2.58821	-1.1507	0.695954
HNRNPK	1.25338	1.46191	-2.71495	-1.39931
HNRNPR	1.94111	1.05839	-2.05155	-2.1654
HNRPA1L3	-0.442222	ND	-3.32193	ND
HSPA1L	0.775683	0.734725	0.347917	-2.30844
HSPA5	0.8024	0.384298	1.48882	-0.75865
HSPA8	0.755315	0.775411	-0.237787	-1.14506
HTATSF1	0.173767	1.50151	0.63136	-0.710814
IGF2BP3	1.09491	ND	-2.2556	ND
ILF2	1.4351	ND	-1.03926	ND
ILF3	1.25822	-1.8997	-0.74594	1.17913
LUC7L2	0.291604	-0.751352	2.97852	1.82556
LUC7L3	0.337996	0.236831	0.746748	0.2494
MBNL1	-1.13289	-3.04088	-1.04499	1.91256
NCBP1	0.0229004	-0.155549	-0.030567	0.152877	CBP80
NCBP2	-0.0232698	0.201689	0.0307524	-0.197775	CBP20
PCBP1	0.356144	-0.436532	2.28466	2.36987	HNRNPE1, HNRNPX
PCBP2	-0.590745	-1.34871	0.821686	1.97617	HNRNPE2
PDCD6	-0.046921	-1.83353	-1.7681	-0.989782
PHF5A	0.959028	0.40558	1.61449	1.29785	SF3B7, SAP14B
PRKDC	0.319618	0.181805	-0.161669	-0.154578
PRPF19	0.619178	1.22047	-0.349906	-1.47198	PRP19
PRPF4	1.34255	2.48408	-0.305102	-0.92914	PRP4
PRPF40A	0.898402	0.329335	1.4669	1.64936	PRP40, FNBP3
PRPF6	1.14274	-0.371274	-0.105288	-2.08848	PRP6
PRPF8	0.970854	0.591261	-0.032982	0.175801	PRP8
PSMA7	0.328836	0.995917	-1.81161	ND
PTBP1	-1.71786	-5.025	-1.32906	0.226143	PTB
PUF60	0.243669	0.1987	1.87645	1.32079
RAVER1	-3.50635	ND	-3.06711	ND
RBM25	0.835116	0.301365	1.56512	1.77816	SNU71
RBM39	1.14796	0.198005	2.33747	1.87498
RBM45	0.947105	ND	-0.939622	ND
RBM9	-0.265345	ND	-1.60452	ND
RBMX	1.83512	1.38007	-0.753981	-1.07721	HNRNPG
RPS27A	3.22527	0.0566849	-0.292307	-1.00608
SART1	1.53406	0.488051	-0.120955	1.15711	SNU66
SF1	1.07861	0.446666	1.32018	2.00646	BBP
SF3A1	1.05102	0.446931	1.80538	1.50375	SAP114
SF3A2	0.87342	0.814559	1.85822	1.10104	SF3A66, SAP62
SF3A3	1.1003	0.326477	1.37013	1.41065	SF3A60, SAP61
SF3B1	1.05658	0.525712	1.5067	1.15928	SF3B155, SAP155
SF3B14	0.885965	0.59241	1.61563	0.913083	SAP14
SF3B2	1.17887	0.601199	1.46678	1.2182	SF3B145, SAP145, CUS1
SF3B3	1.07313	0.462048	1.42981	1.3427	SF3B130, SAP130
SF3B4	1.31962	0.986835	1.11192	-2.39323	SF3B50, SAP49
SFRS1	0.435095	-0.643517	0.843663	0.946998	ASF, SF2, SRp30a
SFRS11	0.14274	1.19547	1.31254	0.588306	SRSF11
SFRS12	0.619178	-1.1077	2.01797	3.23552	SREK1
SFRS3	1.49365	1.03496	2.13489	0.667168	SRSF3, SRp20
SFRS6	0.0342157	-0.203485	1.23512	0.95001	SRSF6, SRp55
SFRS7	1.03984	-0.372966	1.82388	1.68828	SRSF7, 9G8
SFRS9	0.588805	1.02708	0.392025	0.0190031	SRSF9, SRp30c
SNRNP200	1.02857	0.552308	0.0632999	0.0271678	BRR2
SNRNP40	1.42653	ND	-0.0077495	-6.15874	SFP38, U5-40K
SNRNP70	0.27262	-0.153962	0.185341	0.0837354	U1-70K
SNRPA	0.22404	0.0688485	0.17179	0.179082	U1A
SNRPA1	0.910733	1.40729	1.70178	0.778714	U2A'
SNRPB	0.173767	0.299298	0.787708	0.314424	Sm-B/B'
SNRPB2	0.847997	0.265042	1.28432	0.82247	U2B"
SNRPC	0.22404	0.0773673	-0.00606513	-0.107251	U1C
SNRPD1	0.58111	0.183756	0.722466	0.48357	Sm-D
SNRPD2	0.41792	0.254663	0.531802	0.421528	Sm-D2
SNRPD3	0.382944	0.0604254	0.456532	0.252343	Sm-D3
SNRPE	0.347099	ND	0.664182	ND
SNRPEL1	0.347099	ND	0.664182	ND
SNRPF	0.426533	0.236128	0.686567	-0.204142	Sm-F
SNRPN	0.14274	0.306416	0.763073	0.314031	Sm-N
SRRM2	1.06212	0.644441	-0.82468	-2.13128	CWC21, SRm300
SRRT	0.734655	0.473195	1.19134	1.27513	ARS2
SYNCRIP	2.04264	0.91701	-2.61268	-1.88055	HNRNPQ
TRA2B	1.7277	0.205505	2.10438	0.650145	SFRS10
U2AF1	0.400538	0.0840109	0.890653	1.47415	U2AF35
U2AF2	0.67084	-0.203035	0.852019	1.30568	U2AF65, MUD2
USP39	0.27262	-0.347015	0.768482	0.958266	SAD1
YBX1	-0.237864	0.629812	-0.343353	-1.03612	YB-1, CSDB
ZC3H18	1.69599	ND	1.79817	ND
ZNF207	0.596458	0.409945	1.3033	0.700194

## Sheet: Supplemental File 1d
Supplemental File 1d. NSAF scores of proteins identified in SILAC experiment 1
NSAF scores x 1E5 were calculated as in Florens et al., Methods, 2006 (PMID:17101441 ).
Light peptides were used to calculate the scores for proteins in the active and EDC complexes, whlle heavy peptides were used to calculate the scores for the repressed complex
NSAF scores of proteins in the repressed complex were derived from 2 MS runs: [repressed+active] and [repressed+EDC] and averaged.
0 = No peptide detected
Gene	Repressed	Active	EDC
ACIN1	0	0	22.1237
ACLY	181.322	405.488	0
ACTB	0	366.311	276.901
ACTG1	0	366.311	276.901
ALB	0	112.781	170.505
ALDH2	0	66.4249	143.462
AMY1A	0	134.41	58.0586
ANXA1	0	99.2534	0
ANXA2	0	759.772	437.58
AQR	0	23.1257	0
ARG1	0	479.93	322.478
ARGLU1	0	0	108.674
ATP5B	0	194.754	616.914
AZGP1	0	230.481	149.335
BUB3	1064.94	366.451	497.481
C22orf28	0	136.007	0
CALML5	0	1293.69	812.82
CALU	0	0	141.276
CASP14	0	425.723	306.487
CAT	0	130.329	112.592
CCNK	0	0	51.1516
CD2BP2	0	151.063	87.0028
CDC5L	0	149.87	73.9849
CDK12	0	0	89.6012
CDSN	0	97.3772	112.166
CELF1	1232.12	176.655	183.135
CHERP	0	56.2364	0
CLTC	0	0	26.5683
CSDA	1878.03	323.107	398.763
CST1	0	243.558	315.616
CST4	0	365.337	526.027
CST6	0	0	199.114
CSTA	0	1401.7	756.835
CTSD	0	125.03	72.0096
DCD	0	624.394	539.417
DDX1	0	46.4077	0
DDX17	690.972	317	182.572
DDX23	243.381	209.4	325.624
DDX46	968.056	349.746	978.38
DDX5	568.916	503.38	410.713
DHX15	0	129.591	167.932
DHX36	297.076	136.277	88.2975
DMKN	0	0	62.3276
DNAJC8	0	135.738	644.955
DSC1	0	307.308	215.707
DSC3	0	57.4917	49.6673
DSG1	0	261.9	254.539
DSP	0	508.367	397.846
EEF1A1	0	74.3005	192.566
EEF1A2	0	74.3005	192.566
EEF1AL3	0	74.3005	192.566
EEF1G	0	0	67.89
EFTUD2	308.014	300.313	381.532
EIF3A	0	0	21.4674
EIF3B	0	0	36.4471
EIF3C	0	0	32.495
EIF4A1	0	0	109.611
ELAVL1	765.328	263.356	0
ENO1	0	158.257	0
FABP5	0	890.34	439.525
FAM120A	0	76.7927	0
FECH	0	1461.35	1507.95
FLG	0	33.8258	32.8751
FLG2	0	129.266	80.6531
FUS	0	130.577	0
GAPDH	0	410.05	309.964
GFAP	0	0	68.6758
GGCT	0	182.669	236.712
GNB2L1	0	0	93.5897
GPATCH8	0	0	98.7615
HNRNPA0	818.023	225.191	0
HNRNPA1	5365.69	784.689	319.01
HNRNPA2B1	4806.28	1021.49	210.113
HNRNPA3	1716.19	317.979	78.4866
HNRNPAB	0	103.439	0
HNRNPC	666.352	448.911	145.431
HNRNPD	562.176	193.474	0
HNRNPF	1202.43	206.878	178.723
HNRNPH1	2222.72	382.424	264.302
HNRNPH3	865.38	148.88	0
HNRNPK	970.014	445.033	128.155
HNRNPL	338.886	204.068	0
HNRNPM	0	0	40.641
HNRNPR	1103.7	759.532	374.95
HNRNPU	0	166.505	0
HNRNPUL2	0	229.864	0
HRNR	0	698.883	499.671
HSPA1L	0	107.15	69.4258
HSPA2	0	0	116.072
HSPA5	0	183.786	453.638
HSPA8	386.218	345.543	344.442
HSPA9	0	50.5768	87.3872
HSPB1	0	251.281	289.443
HSPD1	0	0	51.7765
HTATSF1	264.417	90.9713	157.181
IGF2BP3	0	177.936	76.86
IGHA1	0	98.4849	127.622
IGHA2	0	98.4849	127.622
ILF2	0	88.0556	114.107
ILF3	279.079	249.688	199.114
JUP	0	345.722	378.316
KPRP	0	177.936	102.48
KRT1	0	8718.73	6057.97
KRT10	0	2440.38	2006.65
KRT13	0	562.364	647.772
KRT14	0	2073.6	1979.96
KRT16	0	1924.01	2038.5
KRT17	0	1510.4	1304.84
KRT19	0	472.198	482.104
KRT2	0	2902.11	2182.15
KRT20	0	0	244.9
KRT23	0	81.3784	0
KRT3	0	600.57	518.835
KRT4	0	321.551	500.022
KRT5	0	1891.7	1583.97
KRT6A	0	2131.13	2025.21
KRT6B	0	4170.93	3287.67
KRT6C	0	2192.02	2051.51
KRT72	0	268.819	145.146
KRT73	0	254.383	219.763
KRT76	0	403.703	302.26
KRT77	0	387.536	309.041
KRT78	0	627.396	427.903
KRT79	0	545.615	388.179
KRT8	0	0	307.122
KRT80	0	303.909	295.367
KRT9	0	7772.35	5666.91
LGALS7	0	378.769	327.22
LSM2	0	542.237	0
LUC7L	0	0	359.854
LUC7L2	0	87.6063	529.785
LUC7L3	808.562	238.484	309.041
MATR3	0	0	35.0271
MBNL1	1800.59	309.783	152.928
MYH9	0	26.2819	15.1367
NCBP1	1200.14	326.029	356.766
NCBP2	1919.27	880.556	855.806
PABPC1	0	54.3984	0
PABPC1L	0	54.3984	0
PABPC3	0	54.3984	0
PABPC4	0	54.3984	0
PCBP1	0	192.931	708.364
PCBP2	2050.66	188.174	447.051
PCNXL2	0	0	20.8245
PDCD6	2090.09	539.398	232.994
PHF5A	2268.3	624.394	809.126
PIP	0	235.217	203.205
PKM2	0	226.358	111.744
PKP1	0	114.932	59.5742
POF1B	0	115.434	0
PPIH	0	388.042	167.616
PPP2R1A	0	0	50.37
PRDX1	0	517.714	223.628
PRDX2	0	433.607	299.676
PRDX3	0	0	115.89
PRH1	0	206.878	357.445
PRKDC	72.5342	54.0748	82.6505
PRPF19	593.966	170.346	117.73
PRPF3	0	75.421	86.8754
PRPF31	0	0	118.91
PRPF38B	0	0	54.3369
PRPF4	0	197.366	113.67
PRPF40A	938.56	287.078	542.517
PRPF6	318.228	182.474	283.753
PRPF8	384.736	227.964	235.057
PRSS1	0	0	120.113
PRSS2	0	0	120.113
PSMA1	0	130.577	0
PSMA5	0	213.745	0
PSMA7	804.98	136.983	118.34
PSMA8	0	136.983	118.34
PSMB6	0	143.689	0
PTBP1	6390.3	452.715	251.423
PUF60	1517.49	645.058	1008.39
RBM25	1302.3	611.062	950.219
RBM39	659.054	259.182	587.761
RBM45	733.788	252.512	249.31
RBM9	1023.61	176.111	190.179
RBMX	0	131.746	113.816
RNPS1	0	0	97.2719
RPS13	0	0	196.476
RPS18	0	0	487.96
RPS19	0	0	306.91
RPS2	0	0	151.884
RPS27A	0	677.796	390.368
RPS3	0	0	183.135
RPS3A	0	0	112.379
RPS4X	0	0	169.209
RPS8	0	0	285.269
RPS9	0	0	152.928
RPSA	0	0	201.139
RUVBL2	0	74.1721	0
S100A7	0	510.025	0
S100A8	0	0	478.515
S100A9	0	451.864	520.49
SAP30BP	0	0	96.3245
SART1	0	171.708	74.1699
SBSN	0	0	120.113
SERPINB12	0	296.78	219.763
SERPINB3	0	176.111	76.0717
SERPINB4	0	176.111	76.0717
SF1	390.449	214.971	348.215
SF3A1	1132.68	649.59	991.426
SF3A2	537.709	185.031	287.728
SF3A3	796.822	548.37	888.262
SF3B1	956.636	500.377	750.799
SF3B14	1596.83	412.1	593.359
SF3B2	457.807	334.753	816.549
SF3B3	1107.08	437.384	816.661
SF3B4	0	121.492	104.957
SF3B5	0	399.322	862.44
SFRS1	0	553.898	657.958
SFRS11	618.51	177.385	367.784
SFRS12	589.381	202.805	467.212
SFRS13A	0	0	169.855
SFRS3	0	314.101	633.157
SFRS4	0	0	240.226
SFRS5	0	0	327.22
SFRS6	0	249.576	431.22
SFRS7	838.671	288.586	685.604
SFRS9	903.326	0	268.488
SHMT2	0	0	58.865
SKIV2L2	0	65.9149	28.4721
SLC25A4	0	0	199.114
SLC25A5	0	0	199.114
SMNDC1	0	0	124.655
SMR3B	0	869.41	938.859
SNRNP200	537.319	297.435	333.348
SNRNP27	0	0	191.406
SNRNP40	0	240.488	249.31
SNRNP70	2169.55	667.973	678.9
SNRPA	1415.57	548.006	368.219
SNRPA1	2348.28	673.366	1279.79
SNRPB	1455.48	572.361	865.315
SNRPB2	1552.51	457.889	725.216
SNRPC	2196.95	431.971	279.886
SNRPD1	2935.28	721.464	997.242
SNRPD2	5497.63	1309.64	1634.25
SNRPD3	2772.34	1226.49	1295.03
SNRPE	2169.61	373.279	322.478
SNRPEL1	2169.61	373.279	322.478
SNRPF	0	399.322	344.976
SNRPG	0	0	390.368
SNRPG-like	0	0	390.368
SNRPN	1455.48	572.361	865.315
SOD1	0	222.998	0
SR140	0	33.3738	43.2477
SRRM2	507.713	212.14	156.317
SRRT	1025.33	470.434	745.085
STRBP	0	178.863	0
STT3A	0	0	42.0822
SYNCRIP	1361.7	881.969	285.727
TGM1	0	63.0508	36.3133
TGM3	0	198.22	149.838
THOC1	0	0	180.627
THOC2	0	0	139.68
THOC3	0	0	169.048
THOC5	0	0	130.313
THOC6	0	0	217.507
THOC7	0	0	145.431
THRAP3	0	0	46.5989
TPI1	0	137.918	0
TRA2A	0	0	210.411
TRA2B	0	238.484	360.548
TRIO	0	0	9.57958
TRY6	0	0	120.113
TTN	0	0	1.72739
TUBA1A	664.903	152.426	197.523
TUBA1B	664.903	152.426	197.523
TUBA1C	664.903	152.426	197.523
TUBB	449.629	76.9993	266.08
TUBB2C	0	0	233.343
TUBB3	0	76.9993	266.08
TXN	0	490.595	282.552
U2AF1	1247.52	214.636	370.849
U2AF2	840.404	325.342	530.9
USP39	353.336	212.736	262.548
VIM	0	0	95.4977
YBX1	3542.33	741.95	686.758
ZC3H18	0	36.0353	513.663
ZC3H4	0	65.8896	0
ZCCHC8	0	121.435	41.9631
ZNF207	0	71.8445	217.234
ZNF569	0	0	43.2477

## Sheet: Supplemental File 1e
Supplemental File 1e. NSAF scores of proteins from SILAC experiment 2
NSAF scores x 1E5 were calculated as in Florens et al., Methods, 2006 (PMID:17101441 ).
Light peptides were used to calculate the scores for proteins in all three complexes
0 = No peptide detected
Gene	Repressed	Active	EDC
ABCF1	35.2237	0	0
ACIN1	22.1954	78.1188	174.44
ACLY	459.572	582.778	223.648
ACTB	357.169	279.353	328.315
ACTG1	357.169	279.353	328.315
ACTL6A	0	61.0474	0
ADRM1	73.1304	0	0
AGGF1	0	0	86.2171
AGL	29.1424	0	0
AIMP1	143.096	167.88	0
ALB	171.058	107.51	181.948
ALDH9A1	0	53.0148	0
AMY1A	58.2467	76.8767	0
AMY2A	58.2467	76.8767	0
AMY2B	58.2467	76.8767	0
ANXA1	0	0	106.75
ANXA2	702.397	424.901	581.088
APEX1	140.397	0	0
AQR	20.0431	44.0898	0
ARG1	231.087	122	229.412
AZGP1	449.457	219.709	330.518
BAT1	243.682	168.469	86.3986
BCAS2	264.569	290.993	0
BCLAF1	0	0	120.442
BLMH	0	0	54.1178
BUB3	544.465	399.228	487.968
C14orf166	0	107.333	0
C19orf43	253.671	148.803	139.907
CABIN1	0	0	11.0917
CAD	33.4428	47.0819	0
CALM1	199.759	0	0
CALML3	199.759	175.767	165.259
CALML5	917.386	448.448	590.292
CASP14	799.448	541.102	508.752
CAT	112.957	124.238	116.81
CCAR1	271.759	125.253	117.765
CCDC75	0	0	0
CCT2	139.084	146.856	0
CCT3	191.145	288.323	0
CCT4	193.273	145.766	0
CCT5	137.542	193.636	0
CCT6A	140.132	197.283	0
CCT7	219.256	217.039	0
CCT8	298.727	406.221	0
CD2BP2	218.212	153.603	252.735
CDC27	0	31.7832	0
CDC5L	185.562	261.24	92.1082
CDK11A	75.5913	66.5126	0
CDK11B	75.5913	66.5126	0
CDSN	168.794	99.0145	139.642
CELF1	275.593	80.8313	177.33
CHERP	97.4806	85.7729	80.645
COPB2	0	28.9065	0
CPSF7	0	55.6037	0
CRNKL1	0	108.093	0
CRNN	0	52.9077	0
CSDA	680.093	633.613	562.636
CST1	422.185	278.61	261.953
CST2	0	278.61	0
CST4	0	278.61	0
CST6	199.759	0	0
CSTA	1063	534.476	753.784
CSTF1	0	60.7641	0
CSTF2	0	45.3888	0
CTSD	0	0	0
DARS	118.819	104.548	49.1489
DCD	541.165	595.212	447.702
DDX1	0	35.391	0
DDX17	343.432	382.767	435.648
DDX23	217.786	239.537	375.36
DDX39	243.682	168.469	86.3986
DDX3X	89.9216	197.805	37.1958
DDX46	519.644	469.935	907.562
DDX5	339.33	383.883	421.088
DHX15	355.671	230.598	278.758
DHX36	191.931	142.898	122.141
DHX8	0	21.4667	0
DHX9	82.027	82.4861	48.4716
DKC1	0	101.904	47.9058
DMKN	62.5295	0	0
DNAJA2	0	63.5663	0
DNAJB1	131.312	269.596	0
DNAJC7	0	106.03	0
DNAJC8	235.289	310.545	583.959
DSC1	216.405	219.709	247.889
DSC3	49.8282	29.2292	41.2225
DSG1	241.177	199.728	211.261
DSP	393.951	355.759	415.968
DYNC1H1	76.8766	87.3729	5.29996
DYNC1I2	46.6521	0	0
DYNC1LI1	0	75.1128	0
ECM1	0	72.7482	45.5993
ECM29	56.463	42.5843	0
EEF1A1	322.122	226.747	239.84
EEF1AL3	322.122	226.747	239.84
EEF1B2	264.569	232.794	0
EEF1D	476.649	372.802	0
EEF1G	612.99	539.368	169.041
EEF2	69.3801	0	100.446
EFTUD2	153.107	148.191	240.663
EIF1AX	310.042	272.806	0
EIF2A	76.3181	156.688	0
EIF2S1	0	83.1407	0
EIF2S2	89.9216	237.366	0
EIF2S2-like	89.9216	237.366	0
EIF2S3	126.119	166.458	0
EIF4A1	0	0	90.862
EIF4A2	0	0	90.862
ELAVL1	136.951	281.174	302.13
ENO1	102.871	150.86	141.841
EPRS	127.954	138.568	56.9991
ERH	0	251.821	473.531
ESRP2	163.764	36.0238	67.7403
EWSR1	45.372	39.9228	75.0719
FABP5	1102.37	484.988	911.985
FAM120A	53.2452	117.126	0
FAM98B	90.1941	0	0
FIP1L1	0	44.0898	0
FLG	14.6585	25.7959	18.1903
FLG2	99.587	120.486	123.581
FOX1	265.886	0	62.8474
FUS	282.928	224.053	163.845
GAPDH	266.544	312.708	294.013
GEMIN4	0	24.7536	0
GEMIN5	98.6872	112.885	89.8075
GGCT	316.639	208.957	261.953
GNB2L1	0	0	310.708
GPATCH8	0	0	57.3786
GSN	57.0922	0	0
GTF2I	44.7356	78.7255	0
H2AFJ	228.427	0	188.976
H2AFV	228.427	0	188.976
H2AFX	228.427	0	188.976
H2AFZ	228.427	0	188.976
HDLBP	0	0	19.4192
HIST1H2AA	228.427	0	188.976
HIST1H2AB	228.427	0	188.976
HIST1H2AC	228.427	0	188.976
HIST1H2AD	228.427	0	188.976
HIST1H2AG	228.427	0	188.976
HIST1H2AH	228.427	0	188.976
HIST1H2AJ	228.427	0	188.976
HIST2H2AA3	228.427	0	188.976
HIST2H2AC	228.427	0	188.976
HIST3H2A	228.427	0	188.976
HNRNPA1	880.12	387.208	595.732
HNRNPA2B1	590.222	296.763	244.143
HNRNPA3	275.593	0	97.7127
HNRNPAB	134.476	118.325	111.251
HNRNPC	392.407	1035.83	324.635
HNRNPCL1	392.407	1035.83	324.635
HNRNPD	125.764	221.318	138.724
HNRNPF	215.162	0	118.668
HNRNPH1	464.028	87.4922	137.102
HNRNPH3	129.035	75.6917	0
HNRNPK	482.139	537.362	452.053
HNRNPL	101.066	200.088	104.514
HNRNPR	282.124	268.927	175.049
HNRNPU	108.233	285.702	179.081
HNRNPUL1	34.7711	30.595	0
HNRNPUL2	179.302	298.004	115.372
HNRPLL	0	48.3198	0
HRNR	172.318	206.758	172.797
HSP90AB1	61.6659	108.519	0
HSPA1A	162.518	265.57	172.865
HSPA1L	116.084	142.999	96.0359
HSPA2	279.475	0	0
HSPA5	113.777	80.0897	75.3015
HSPA6	115.723	122.19	95.7372
HSPA8	598.967	405.408	419.287
HSPB1	217.786	319.382	300.288
HSPD1	0	0	42.9731
HTATSF1	295.67	312.191	244.605
IARS	117.924	124.513	0
IGF2BP3	51.406	0	0
IGHA1	85.8992	113.374	71.0638
IGHA2	85.8992	113.374	71.0638
IGHG1	0	0	0
IGKC	0	247.069	348.447
IGLC1	0	249.422	0
IK	0	47.0186	88.4151
IL1F9	176.119	0	0
ILF2	76.3181	67.1521	63.1374
ILF3	166.466	190.415	165.259
ISY1	0	158.244	0
JUP	459.445	456.995	528.829
KARS	124.64	131.605	0
KHSRP	104.803	36.8864	173.406
KIAA1967	161.235	42.5612	0
KLK7	0	103.515	0
KPNA2	56.2648	0	0
KPRP	359.842	294.008	361.486
KRT1	5522.99	6466	6633.84
KRT10	1376.08	1614.41	1264.91
KRT12	0	185.552	0
KRT13	324.935	600.411	537.633
KRT14	1292.72	1470.38	1434.64
KRT15	0	574.328	485.992
KRT16	1069.74	1384.21	1379.55
KRT17	792.33	939.664	883.486
KRT18	0	0	85.8963
KRT19	334.846	425.577	369.354
KRT2	1374.08	1618.9	1271.64
KRT3	378.557	499.638	352.325
KRT31	70.2314	0	87.1529
KRT32	70.2314	0	87.1529
KRT33B	70.2314	0	87.1529
KRT35	70.2314	0	87.1529
KRT4	111.476	269.74	322.781
KRT5	1210.74	1176.3	1272.91
KRT6A	1319.33	1230.53	1375.25
KRT6B	3588.58	4295.24	4191.25
KRT6C	1319.33	1276.96	1375.25
KRT7	0	139.602	0
KRT72	174.74	128.128	120.468
KRT73	222.286	195.589	137.922
KRT74	222.286	195.589	137.922
KRT75	0	451.54	446.889
KRT76	0	328.393	0
KRT77	180.858	181.87	128.248
KRT78	400.67	453.277	449.854
KRT79	389.436	318.188	0
KRT80	164.624	289.705	163.431
KRT85	117.412	0	0
KRT86	183.729	0	0
KRT9	2890.41	2837.53	2964.32
LARS	101.238	89.0794	31.4076
LBA1	10.1757	0	0
LDHA	0	0	74.1675
LDHB	0	0	73.7233
LGALS7	328.28	288.853	452.64
LMNA	0	59.1627	0
LTF	41.9212	92.216	52.0217
LUC7L	200.566	141.182	331.854
LUC7L2	227.786	100.214	376.892
LUC7L3	241.144	272.806	313.495
LYZ	0	176.955	0
MAGOH	0	0	167.507
MAGOHB	0	0	167.507
MAP4	64.5922	102.302	64.124
MARS	49.6068	43.6489	27.3596
MATR3	193.273	30.9201	43.6073
MBNL1	270.582	136.048	191.872
MBNL2	270.582	136.048	191.872
MBNL3	0	0	173.895
MTA2	0	58.8084	0
MYH9	37.9644	13.3619	18.8446
NCBP1	339.084	248.633	374.029
NCBP2	953.976	587.581	868.14
NCCRP1	108.233	95.2339	89.5404
NCL	0	55.3296	0
NEB	0	0	0
NHP2L1	0	0	192.372
NUDT21	131.119	0	0
PA2G4	113.315	99.7056	93.7447
PAF1	0	49.3208	0
PARP1	58.7062	90.3971	24.2836
PCBP1	167.214	110.348	242.086
PCBP2	203.863	143.503	202.386
PCNP	334.428	294.262	276.67
PDCD6	389.582	137.117	257.839
PDCD7	0	107.997	0
PDS5A	0	19.5881	0
PHAX	302.173	132.941	0
PHF5A	541.165	714.255	895.404
PIGR	38.9582	0	32.2298
PIP	0	0	168.655
PKM2	196.185	98.6416	185.488
PKP1	179.302	140.237	230.743
PLEC1	0	0	7.88544
PLRG1	57.9067	152.856	0
PNN	0	0	103.028
PNP	102.99	0	85.2028
POF1B	0	44.0157	41.3842
POTEE	0	0	91.6227
PPIE	0	87.0078	0
PPIG	0	0	65.3146
PPIH	0	0	278.233
PRDX1	523.489	263.209	371.21
PRDX2	225.485	132.269	124.362
PRKDC	169.442	187.157	134.213
PRPF19	177.167	155.889	73.2845
PRPF3	0	0	54.0782
PRPF38B	81.7694	71.9487	90.1963
PRPF4	85.5289	75.2567	117.929
PRPF40A	279.913	232.612	463.14
PRPF40B	0	0	155.488
PRPF4B	0	0	48.9049
PRPF6	189.781	194.82	353.261
PRPF8	191.204	190.672	258.363
PRPS1	280.793	164.713	0
PRPS2	140.397	123.535	0
PRPSAP1	83.6069	0	0
PRPSAP2	120.992	70.9738	66.7306
PSMA1	339.514	497.896	0
PSMA2	127.197	111.92	0
PSMA3	116.722	154.055	0
PSMA4	171.058	100.342	0
PSMA5	247.005	271.674	0
PSMA6	423.472	425.843	0
PSMA7	300.041	369.608	0
PSMB1	370.507	271.674	0
PSMB2	222.12	195.443	0
PSMB3	145.191	191.629	0
PSMB4	0	148.803	0
PSMB5	452.685	547.686	0
PSMB6	0	164.368	0
PSMB7	0	94.5463	0
PSMC1	101.468	119.042	0
PSMC2	206.218	211.692	0
PSMC3	135.599	119.314	0
PSMC4	0	62.6539	0
PSMC5	146.621	193.517	0
PSMC6	153.029	100.987	0
PSMD1	78.0799	96.1833	0
PSMD11	317.389	279.27	0
PSMD12	65.2721	86.1491	0
PSMD13	237.479	174.131	0
PSMD2	114.729	129.793	0
PSMD3	167.214	147.131	0
PSMD4	236.849	243.137	0
PSMD6	76.5143	201.974	0
PSMD7	0	161.663	0
PSMD8	173.72	101.904	0
PSME4	0	42.6305	0
PTBP1	588.555	98.6416	115.93
PUF60	532.452	398.228	638.716
PYGB	52.8356	30.9933	0
PYGL	52.8356	30.9933	0
PYGM	52.8356	30.9933	0
QARS	76.8105	118.274	0
RALY	0	299.551	120.704
RANBP9	40.8286	0	0
RARS	157.84	178.564	0
RAVER1	221.02	0	0
RAVER2	43.0739	0	0
RBBP4	105.05	92.4329	202.783
RBBP7	105.05	92.4329	202.783
RBM10	64.0087	70.4014	39.7155
RBM17	334.011	293.895	153.514
RBM25	776.761	434.936	876.285
RBM39	336.952	222.362	557.515
RBM45	125.059	0	51.7302
RBM47	100.385	0	0
RBM5	164.341	112.47	75.5325
RBM9	265.886	0	62.8474
RBMX	114.184	167.451	220.416
RDBP	117.49	68.9193	0
RNF213	0	15.9691	0
RNPC3	0	101.313	0
RNPS1	0	0	80.7331
ROD1	107.841	0	0
RPS11	0	0	311.691
RPS12	0	0	279.814
RPS13	0	0	163.07
RPS14	0	0	244.605
RPS16	0	0	168.655
RPS18	0	0	728.988
RPS19	0	0	254.727
RPS21	0	0	296.67
RPS25	0	0	196.989
RPS27	0	0	293.138
RPS27A	1370.71	2239.88	1457.98
RPS3	0	0	253.329
RPS3A	0	0	186.542
RPS4X	0	0	187.252
RPS6	0	0	148.335
RPS8	0	0	414.339
RPS9	0	0	190.389
RPSA	0	0	166.94
RUVBL1	97.9081	201.015	53.9991
RUVBL2	128.57	141.411	0
S100A7	294.694	0	365.697
S100A8	320.044	281.606	264.77
S100A9	261.088	344.597	0
SAFB	48.7935	143.111	0
SAFB2	31.232	82.4428	0
SAP30BP	193.273	85.0303	119.92
SART1	111.615	98.21	246.236
SERPINA12	0	94.8889	59.4773
SERPINB12	220.475	161.663	121.598
SERPINB3	228.954	100.728	157.844
SERPINB7	156.653	68.9193	64.7989
SF1	46.5791	40.9849	308.277
SF3A1	525.469	561.436	714.177
SF3A2	160.367	56.4425	159.204
SF3A3	356.456	287.508	663.51
SF3B1	490.742	411.719	642.026
SF3B14	714.338	838.059	787.955
SF3B2	426.664	390.437	649.476
SF3B3	403.539	408.872	647.457
SF3B4	105.297	92.6509	145.186
SF3B5	865.234	913.581	1145.28
SF4	46.1458	40.6036	190.881
SFRS1	900.123	686.414	1191.46
SFRS11	430.472	351.716	712.253
SFRS12	146.477	154.661	412.009
SFRS13A	170.535	100.036	282.165
SFRS15	25.9495	0	0
SFRS2B	0	139.305	87.3177
SFRS3	453.72	479.073	675.647
SFRS4	150.628	79.5223	174.459
SFRS5	218.853	96.2843	226.32
SFRS6	346.094	190.329	322.111
SFRS7	562.766	495.176	724.223
SFRS9	269.358	355.511	445.676
SKIV2L2	0	25.1337	23.6311
SLC4A1AP	0	0	108.27
SMARCA2	18.3899	16.1812	0
SMARCA4	18.3899	16.1812	0
SMARCC1	0	23.7008	0
SMC2	0	21.8791	0
SMN1	0	0	83.7537
SMU1	0	0	0
SND1	0	0	40.5883
SNRNP200	202.05	183.914	293.961
SNRNP40	0	146.719	275.895
SNRNP48	0	77.2547	0
SNRNP70	783.265	719.158	845.204
SNRPA	474.958	371.48	349.271
SNRPA1	758.692	616.22	1303.6
SNRPB	868.119	545.611	666.889
SNRPB2	529.139	349.191	601.91
SNRPC	374.391	411.782	387.163
SNRPD1	500.236	440.157	620.763
SNRPD2	1513.43	1109.72	1565.06
SNRPD3	708.668	519.63	781.701
SNRPE	0	0	267.648
SNRPEL1	0	0	267.648
SNRPF	346.094	304.527	286.321
SNRPG	0	0	485.992
SNRPG-like	0	0	485.992
SNRPN	868.119	545.611	666.889
SOD1	0	170.061	159.893
SON	0	0	45.6744
SPEN	8.12338	0	0
SPRR1A	501.642	882.787	830.009
SPRR1B	501.642	882.787	830.009
SPRR2A	618.367	725.466	1023.14
SPRR2B	618.367	725.466	1023.14
SPRR2D	618.367	725.466	1023.14
SPRR2E	618.367	725.466	1023.14
SPRR2G	618.367	725.466	1023.14
SR140	202.477	165.433	119.648
SRRM1	0	28.9705	0
SRRM2	205.493	147.505	219.214
SRRP35	170.535	100.036	282.165
SRRT	458.693	463.396	646.51
STIP1	191.849	192.923	0
STRBP	177.167	97.4306	0
SUMO2	0	0	259.196
SYNCRIP	238.877	252.225	138.335
TARDBP	71.8939	0	59.4773
TCP1	347.961	329.722	0
TGM3	300.647	170.061	142.128
THOC2	0	0	15.4574
THRAP3	0	95.9819	167.595
TPI1	239.069	210.356	296.67
TPM3	104.803	0	0
TPP2	59.5758	94.3571	0
TRA2A	105.546	139.305	261.953
TRA2B	310.042	272.806	427.493
TSR1	0	0	30.6264
TTN	1.29974	1.14364	1.07527
TUBA1A	231.395	203.604	246.127
TUBA1B	230.985	203.243	245.69
TUBA1C	231.395	203.604	246.127
TUBA4A	199.313	175.375	192.372
TUBB	301.663	265.432	249.563
TUBB2A	0	176.557	0
TUBB2B	0	176.557	0
TUBB2C	267.542	205.984	249.003
TUBB3	132.285	0	0
TXN	0	0	0
TXNL1	154.485	90.6205	0
U2AF1	372.051	272.806	461.692
U2AF1L4	202.937	0	223.851
U2AF2	187.984	220.542	311.035
UCHL5	90.4683	199.007	0
USP39	79.0196	162.235	196.117
VAT1	302.942	299.878	0
VCP	73.8562	146.218	0
WDR82	0	83.672	0
WHSC2	56.3713	0	0
XAB2	174.059	183.785	28.7995
XP32	0	209.515	147.742
XRCC5	101.653	107.333	84.097
XRCC6	195.495	301.027	101.082
YBX1	1010.51	1414.55	987.984
YWHAB	0	159.691	0
YWHAE	0	0	0
YWHAG	120.502	265.074	99.6907
YWHAZ	0	106.895	0
ZC3H18	0	0	555.517
ZC3H4	0	50.2481	0
ZC3HAV1	0	29.0347	0
ZCCHC8	0	55.5644	87.0707
ZNF207	186.804	109.579	257.569
ZNF830	80.0109	211.204	0
ZRSR2	0	54.3347	0

## Sheet: Supplemental File 1f
Supplemental File 1f. Positions of PTBP1 crosslinking sites on validated PTBP1-repressed exons
PTBP1-repressed exons in mouse ESC were identified in Linares et al., Elife, 2015 (PMID:26705333). Exons were chosen as both exhibiting ≥15% increase in splicing after PTBP1 depletion by siRNA and containing nearby PTBP1 iCLIP clusters.
iCLIP clusters are designated as in the upstream intron (a); in the BPS and polypyrimidine track (b); in the exon (c); or in the downstream intron (d), as defined in the materials and methods.
											iCLIP position
genesymbol.x	Upstream exon	Cassette exon	Downstream exon			inclusion_ratio control	inclusion_ratio ptbp1 kd	difference			Upstream	BPS and PY	Exon	Downstream		Summary		Type of binding	Count	%
Gabbr1	chr17:37201604-37201682(+)	chr17:37204158-37204309(+)	chr17:37204720-37204853(+)			0.107	0.964	0.857			a		c	d		acd		a	14	14.7368
Reep6	chr10:79796710-79796879(+)	chr10:79797457-79797538(+)	chr10:79797854-79799186(+)			0.043	0.865	0.822			a					a		b	0	0
Lass5	chr15:99566022-99566867(-)	chr15:99567977-99568084(-)	chr15:99569095-99569252(-)			0.026	0.827	0.801				b		d		bd		c	0	0
Dpf2	chr19:5902630-5902768(-)	chr19:5903730-5903772(-)	chr19:5904239-5904318(-)			0.036	0.789	0.753				b		d		bd		d	10	10.5263
Anxa7	chr14:21284065-21284168(-)	chr14:21286679-21286745(-)	chr14:21287092-21287157(-)			0.016	0.731	0.715						d		d		ab	7	7.36842
Kiaa1310 (Kanl3)	chr1:36402682-36402874(-)	chr1:36404061-36404139(-)	chr1:36405369-36405526(-)			0.046	0.754	0.708				b	c			bc		ac	2	2.10526
Sbf2	chr7:117483403-117483588(-)	chr7:117484803-117484878(-)	chr7:117492368-117492509(-)			0.148	0.841	0.693			a					a		ad	32	33.6842
Fnbp1	chr2:30895924-30896034(-)	chr2:30900401-30900416(-)	chr2:30908504-30908687(-)			0.045	0.732	0.687			a	b	c	d		abcd		bc	2	2.10526
Fbxo25	chr8:13935145-13935289(+)	chr8:13938921-13938948(+)	chr8:13939562-13940521(+)			0.05	0.696	0.646			a					a		bd	5	5.26316
Depdc5	chr5:33298501-33298607(+)	chr5:33301929-33301995(+)	chr5:33307280-33307432(+)			0.263	0.906	0.643					c	d		cd		cd	2	2.10526
Braf	chr6:39594236-39594379(-)	chr6:39596723-39596843(-)	chr6:39598448-39598485(-)			0.112	0.755	0.643			a			d		ad		abc	3	3.15789
Tnk2	chr16:32677979-32678071(+)	chr16:32678754-32678799(+)	chr16:32679544-32680893(+)			0.177	0.814	0.637			a			d		ad		abd	7	7.36842
Pbrm1	chr14:31835905-31836045(+)	chr14:31836252-31836365(+)	chr14:31838683-31838836(+)			0.131	0.767	0.636						d		d		acd	5	5.26316
Rapgef1	chr2:29562717-29562920(+)	chr2:29565675-29565828(+)	chr2:29577743-29577829(+)			0.079	0.713	0.634			a		c	d		acd		bcd	1	1.05263
Itsn2	chr12:4646460-4646600(+)	chr12:4647718-4647799(+)	chr12:4656788-4656925(+)			0.001	0.631	0.63			a			d		ad		abcd	5	5.26316
Enah	chr1:183849455-183849760(-)	chr1:183851788-183852631(-)	chr1:183853690-183853971(-)			0.324	0.949	0.625			a	b	c	d		abcd		sum	95	100
Osbpl9	chr4:108775101-108775197(-)	chr4:108780485-108780554(-)	chr4:108806348-108806425(-)			0.023	0.621	0.598			a					a
Idh3g	chrX:71027344-71027442(-)	chrX:71027636-71027648(-)	chrX:71028013-71028055(-)			0.185	0.734	0.549			a	b	c	d		abcd
R3hdm1	chr1:130083334-130083486(+)	chr1:130087214-130087316(+)	chr1:130090036-130090333(+)			0.165	0.707	0.542			a			d		ad
Tcf20	chr15:82639054-82640217(-)	chr15:82644910-82645033(-)	chr15:82646040-82646090(-)			0.176	0.718	0.542				b		d		bd
Mllt4	chr17:13960297-13960465(+)	chr17:13962949-13962994(+)	chr17:13965935-13966030(+)			0.01	0.549	0.539			a			d		ad
Vav2	chr2:27122749-27122904(-)	chr2:27123670-27123757(-)	chr2:27124418-27124542(-)			0.068	0.607	0.539						d		d
ra175a	chr9:47626816-47626900(+)	chr9:47637459-47637492(+)	chr9:47656249-47656381(+)			0.22	0.753	0.533			a	b		d		abd
Ap1b1	chr11:4932420-4932622(+)	chr11:4933244-4933265(+)	chr11:4933689-4933845(+)			0.006	0.538	0.532			a			d		ad
Ctnnd1	chr2:84464426-84464715(-)	chr2:84466176-84466294(-)	chr2:84490562-84490897(-)			0.082	0.602	0.52			a		c	d		acd
Arhgef1	chr7:25702913-25703019(+)	chr7:25704202-25704370(+)	chr7:25704649-25704795(+)			0.08	0.592	0.512			a					a
H13	chr2:152525918-152526004(+)	chr2:152529730-152529930(+)	chr2:152530357-152530788(+)			0.084	0.589	0.505			a			d		ad
Smg7	chr1:154688642-154688723(-)	chr1:154690359-154690509(-)	chr1:154691165-154691537(-)			0.118	0.622	0.504			a	b		d		abd
Pkp4	chr2:59185980-59186098(+)	chr2:59188550-59188679(+)	chr2:59190318-59190392(+)			0.309	0.791	0.482			a					a
Wnk1	chr6:119902702-119902987(-)	chr6:119903788-119904250(-)	chr6:119906088-119906214(-)			0.295	0.752	0.457				b	c			bc
Ganab	chr19:8981704-8981884(+)	chr19:8982340-8982406(+)	chr19:8983167-8983237(+)			0.373	0.827	0.454			a	b				ab
Scrib	chr15:75878050-75878102(-)	chr15:75878351-75878426(-)	chr15:75878544-75878582(-)			0.095	0.535	0.44						d		d
Pip5k1c	chr10:80777736-80777863(+)	chr10:80780070-80780148(+)	chr10:80780510-80782719(+)			0.312	0.744	0.432			a			d		ad
N4bp2	chr5:66177344-66177600(+)	chr5:66179291-66179380(+)	chr5:66181256-66182409(+)			0.362	0.785	0.423			a			d		ad
Ctnnd1	chr2:84452180-84452249(-)	chr2:84452688-84452706(-)	chr2:84453092-84453246(-)			0.553	0.966	0.413			a	b		d		abd
Mgrn1	chr16:4932199-4932298(+)	chr16:4934194-4934239(+)	chr16:4936895-4938296(+)			0.214	0.624	0.41			a			d		ad
Pdlim7	chr13:55608848-55608985(-)	chr13:55609224-55609241(-)	chr13:55609568-55609687(-)			0.035	0.422	0.387			a	b	c			abc
Lphn1	chr8:86446897-86447007(+)	chr8:86450160-86450175(+)	chr8:86453362-86454163(+)			0.197	0.58	0.383			a	b	c	d		abcd
Dst	chr1:34356565-34356683(+)	chr1:34358705-34358777(+)	chr1:34359674-34359877(+)			0.13	0.504	0.374			a			d		ad
Scamp5	chr9:57293878-57293980(-)	chr9:57294883-57295040(-)	chr9:57299162-57299291(-)			0.375	0.742	0.367			a	b				ab
Atg16l1	chr1:89670719-89670806(+)	chr1:89671387-89671444(+)	chr1:89672331-89672434(+)			0.073	0.423	0.35				b		d		bd
Tpd52l2	chr2:181242870-181242972(+)	chr2:181246275-181246320(+)	chr2:181247743-181247792(+)			0.334	0.679	0.345			a			d		ad
2210013O21Rik	chrX:150160247-150160384(+)	chrX:150163404-150163482(+)	chrX:150175582-150175839(+)			0.657	0.999	0.342		lncRNA ?	a			d		ad
Rtn4	chr11:29592897-29593693(+)	chr11:29605534-29605591(+)	chr11:29633632-29633840(+)			0.172	0.506	0.334			a	b				ab
Picalm	chr7:97326009-97326113(+)	chr7:97330728-97330878(+)	chr7:97337659-97337767(+)			0.464	0.792	0.328			a			d		ad
Stra13	chr11:120573157-120573209(-)	chr11:120573753-120574026(-)	chr11:120575006-120575046(-)			0.08	0.402	0.322			a					a
Sec24c	chr14:21503106-21503243(+)	chr14:21504433-21504502(+)	chr14:21505730-21505842(+)			0.141	0.461	0.32			a	b		d		abd
Myo1b	chr1:51823665-51823752(-)	chr1:51825493-51825580(-)	chr1:51825847-51825934(-)			0.364	0.68	0.316					c	d		cd
Tpd52l2	chr2:181242870-181242972(+)	chr2:181246278-181246320(+)	chr2:181247743-181247792(+)			0.436	0.749	0.313			a			d		ad
R3hdm2	chr10:126913575-126913754(+)	chr10:126918748-126918850(+)	chr10:126921031-126921274(+)			0.068	0.368	0.3			a	b				ab
BC024814	chr16:8478059-8478422(+)	chr16:8482219-8482260(+)	chr16:8482348-8482493(+)			0.631	0.931	0.3			a	b				ab
Ubap2l	chr3:89804061-89804175(-)	chr3:89805739-89805790(-)	chr3:89806200-89806398(-)			0.419	0.719	0.3						d		d
Ctnnd1	chr2:84462167-84462239(-)	chr2:84464426-84464715(-)	chr2:84490562-84490897(-)			0.6	0.896	0.296			a		c	d		acd
Tsc2	chr17:24741772-24741937(-)	chr17:24743168-24743297(-)	chr17:24744381-24744476(-)			0.57	0.858	0.288			a			d		ad
R3hdm1	chr1:130078562-130078789(+)	chr1:130080976-130081231(+)	chr1:130083334-130083486(+)			0.641	0.928	0.287			a		c			ac
Med23	chr10:24602359-24602455(+)	chr10:24603009-24603027(+)	chr10:24608205-24608406(+)			0.062	0.342	0.28			a			d		ad
Dctn4	chr18:60703692-60703800(+)	chr18:60705010-60705031(+)	chr18:60705401-60705475(+)			0.031	0.307	0.276			a			d		ad
Arhgef7	chr8:11821959-11822049(+)	chr8:11824504-11824681(+)	chr8:11831492-11831592(+)			0.069	0.328	0.259			a			d		ad
Dock7	chr4:98659059-98659149(-)	chr4:98660337-98660427(-)	chr4:98667723-98667893(-)			0.304	0.547	0.243			a			d		ad
Trip10	chr17:57394695-57394890(+)	chr17:57396282-57396450(+)	chr17:57396657-57396767(+)			0.02	0.25	0.23			a					a
Clasp1	chr1:120435842-120435946(+)	chr1:120438251-120438275(+)	chr1:120439678-120439923(+)			0.14	0.368	0.228			a			d		ad
2310035C23Rik	chr1:107588482-107588686(+)	chr1:107588788-107588880(+)	chr1:107589460-107589754(+)			0.773	0.999	0.226						d		d
Uggt1	chr1:36233077-36233172(-)	chr1:36233620-36233644(-)	chr1:36234362-36234461(-)			0.68	0.9	0.22			a					a
Dock6	chr9:21630226-21630319(-)	chr9:21633917-21634022(-)	chr9:21634657-21634821(-)			0.421	0.638	0.217			a	b	c	d		abcd
Mtss1	chr15:58777400-58777574(-)	chr15:58779877-58779997(-)	chr15:58783024-58783235(-)			0.131	0.344	0.213			a	b				ab
Pxn	chr5:115996821-115996957(+)	chr5:116001496-116001598(+)	chr5:116001859-116002030(+)			0.129	0.335	0.206			a	b				ab
Acap2	chr16:31107135-31107228(-)	chr16:31107613-31107718(-)	chr16:31108112-31108273(-)			0.044	0.248	0.204			a					a
Mtif2	chr11:29429928-29430154(+)	chr11:29430580-29430778(+)	chr11:29433225-29433397(+)			0.709	0.911	0.202				b		d		bd
Ypel3	chr7:133921284-133921467(+)	chr7:133921567-133921611(+)	chr7:133921819-133921928(+)			0.743	0.937	0.194						d		d
Lrrfip1	chr1:92997761-92997887(+)	chr1:92999823-92999895(+)	chr1:93001703-93001874(+)			0.555	0.743	0.188			a					a
Tnrc6b	chr15:80748380-80748527(+)	chr15:80748940-80749036(+)	chr15:80753887-80754112(+)			0.775	0.962	0.187				b	c	d		bcd
Sbno1	chr5:124860078-124860388(-)	chr5:124863193-124863298(-)	chr5:124864407-124864536(-)			0.281	0.467	0.186			a					a
Atp11a	chr8:12859313-12859479(+)	chr8:12861639-12861724(+)	chr8:12864919-12868728(+)			0.738	0.923	0.185			a			d		ad
Rev1	chr1:38128187-38128342(-)	chr1:38131159-38131868(-)	chr1:38136134-38136243(-)			0.592	0.773	0.181			a	b		d		abd
Dzip3	chr16:48950113-48950146(-)	chr16:48951655-48952273(-)	chr16:48953839-48953916(-)			0.527	0.707	0.18						d		d
Eps15l1	chr8:74864897-74865423(-)	chr8:74869864-74870070(-)	chr8:74882211-74882344(-)			0.612	0.792	0.18			a			d		ad
Gtpbp10	chr5:5547926-5548000(-)	chr5:5554823-5554899(-)	chr5:5555237-5555382(-)			0.023	0.201	0.178			a	b		d		abd
Ptprf	chr4:117899058-117899176(-)	chr4:117900423-117900450(-)	chr4:117903299-117903493(-)			0.094	0.268	0.174			a	b	c			abc
Rbfox2	chr15:76916496-76916585(-)	chr15:76922241-76922284(-)	chr15:76928369-76928502(-)			0.157	0.327	0.17			a			d		ad
Ccdc88c	chr12:102161389-102161578(-)	chr12:102163421-102163860(-)	chr12:102167036-102167275(-)			0.107	0.275	0.168			a	b	c			abc
Brd8	chr18:34759479-34759895(-)	chr18:34761856-34761901(-)	chr18:34762325-34762430(-)			0.818	0.985	0.167			a		c	d		acd
Sec31a	chr5:100804226-100804350(-)	chr5:100804979-100805072(-)	chr5:100807846-100808020(-)			0.076	0.243	0.167			a			d		ad
Ppip5k2	chr1:99613118-99613181(-)	chr1:99614018-99614138(-)	chr1:99616410-99616483(-)			0.611	0.778	0.167			a		c			ac
Pmm1	chr15:81786598-81786690(-)	chr15:81788325-81788340(-)	chr15:81791144-81791297(-)			0.598	0.762	0.164			a			d		ad
Sbf1	chr15:89125825-89126007(-)	chr15:89126382-89126460(-)	chr15:89129913-89130051(-)			0.785	0.946	0.161			a			d		ad
Rbm27	chr18:42465333-42465468(+)	chr18:42473624-42473789(+)	chr18:42477254-42477404(+)			0.725	0.883	0.158			a			d		ad
Ptprf	chr4:117889696-117889794(-)	chr4:117890616-117890649(-)	chr4:117893097-117893213(-)			0.055	0.209	0.154			a			d		ad
Cnot10	chr9:114506596-114506724(-)	chr9:114506912-114506948(-)	chr9:114507822-114507953(-)			0.627	0.78	0.153			a					a
Atp2b1	chr10:98481348-98481531(+)	chr10:98481911-98482065(+)	chr10:98485441-98486420(+)			0.013	0.164	0.151						d		d
Puf60	chr15:75902836-75902998(-)	chr15:75905036-75905087(-)	chr15:75905971-75906061(-)			0.397	0.547	0.15						d		d
Mbtd1	chr11:93748335-93748387(+)	chr11:93752652-93752702(+)	chr11:93766472-93766672(+)			0.201	0.35	0.149			a			d		ad
Zfp317	chr9:19426540-19426729(+)	chr9:19428675-19428742(+)	chr9:19433540-19433650(+)			0.12	0.269	0.149			a	b		d		abd
Porcn	chrX:7780917-7780961(-)	chrX:7781321-7781443(-)	chrX:7782690-7782859(-)			0.847	0.996	0.149			a					a
Zfp219	chr14:52627902-52629337(-)	chr14:52629644-52629733(-)	chr14:52640197-52640408(-)			0.797	0.944	0.147			a			d		ad
Pbrm1	chr14:31867343-31867441(+)	chr14:31869421-31869466(+)	chr14:31874654-31874931(+)			0.227	0.372	0.145			a			d		ad
